# ANNOUNCEMENTS

## ANNOUNCEMENT AND CALL FOR ABSTRACTS: ANNUAL JOURNAL SYMPOSIUM

Each year, at the ASA Annual Meeting in October, ANESTHESIOLOGY sponsors a special "Journal Symposium," which takes place on Tuesday morning.

For 2003, the Journal Symposium is entitled "**Preconditioning against Ischemia and Reperfusion Injury.**"

It will take place on Tuesday, October 14, 2003, 9:00 AM-12:30 PM, in the Moscone Center, San Francisco, California (exact location to be announced later).

This will be a poster-discussion session with supplementary formal lectures. Abstracts will be selected by the Symposium organizers, Drs. Zeljko Bosnjak and David Wartier (the 2001 ASA Excellence in Research Award recipient), both from the Medical College of Wisconsin.

Investigators from around the world with an interest in this subject are encouraged to submit their work to the ASA for the Annual Meeting. Abstracts demonstrating the results of clinical studies of pharmacologic preconditioning (in any organ) are particularly encouraged. Abstracts should be submitted *via* the usual online process (which can be accessed *via* the Web sites [www.ASAhq.org](http://www.ASAhq.org) and [www.anesthesiology.org](http://www.anesthesiology.org)). Interested individuals should be sure to check the special box for Journal Symposium.

## ANNOUNCEMENT AND CALL FOR ABSTRACTS: OBSTETRICAL ANESTHESIA

ANESTHESIOLOGY and the Society for Obstetrical Anesthesia and Perinatology (SOAP) are extremely interested in highlighting new and innovative research in the field of Obstetrical Anesthesia. We are therefore jointly organizing a special abstract presentation session for the ASA Annual Meeting in October 2003, San Francisco, California. This will be an *oral* presentation session (without posters). A committee made up of Journal Editors and representatives of SOAP, working together with the Subcommittee on Obstetrical Anesthesia and Perinatology (Annual Meeting), chaired by Dr. David Wlody, will select abstracts for this session. Authors will then be invited to prepare a formal 10-minute oral presentation of their work. Experts in the appropriate areas will be invited to participate in the discussion of each presentation. Our goal is to gather as many individuals with an interest in Obstetrical Anesthesia as possible to participate in this session and to present the most innovative laboratory and clinical research possible.

Individuals are encouraged to consider submitting their work for this session. Abstracts should be submitted to the ASA Annual Meeting using the standard process. Authors should specifically request Obstetrical Anesthesia as the major subject area. In addition, authors should notify the ANESTHESIOLOGY editorial office via e-mail ([anesthesiology@uiowa.edu](mailto:anesthesiology@uiowa.edu)) regarding their interest in being considered for this session.
